# Supplementary material
Source: Springer Nature journal article supplement (https://www.springermedizin.de/resource/supplementary/12985_2013_2284_MOESM2_ESM.pdf/9606446)

**A. Plasma**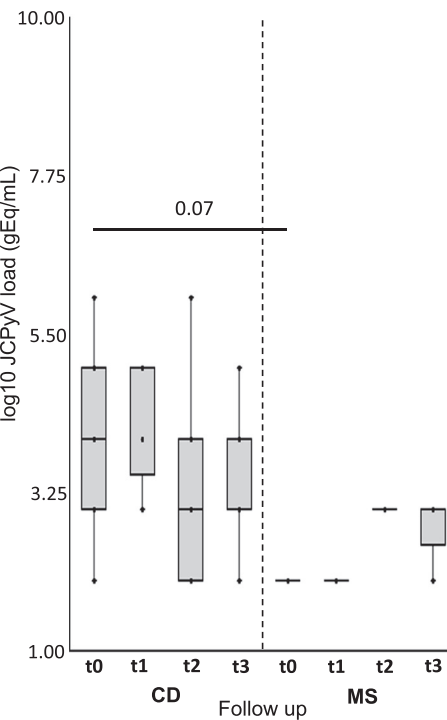**B. Urine**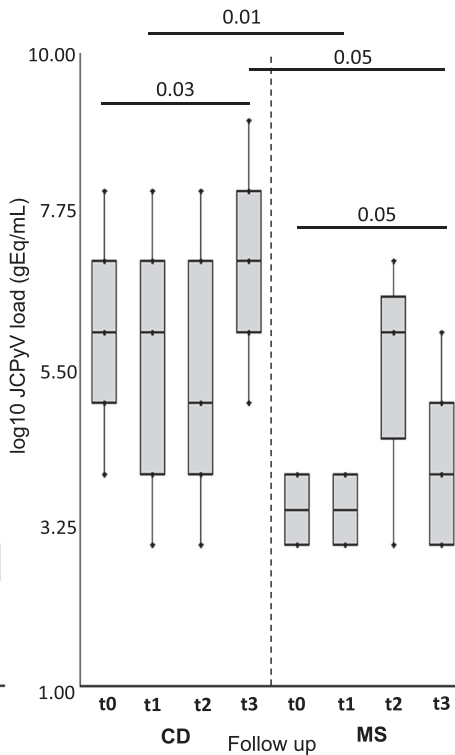

Supplement: MOESM2 [file 9606446]
